1 *Title Page*

2 Short Title (100 chr.)

3 **Forced migration and zoonotic disease**

4 Full Title (250 chr.)

5 **Positioning zoonotic disease research in forced migration: a**  
6 **systematic literature review of theoretical frameworks and**  
7 **approaches**

8 Alex Tasker<sup>1\*</sup>, Dorien Braam<sup>2</sup>

9 <sup>1</sup>Department of Anthropology, University College London, United Kingdom

10 <sup>2</sup>Disease Dynamics Unit, University of Cambridge, United Kingdom

11 \*Corresponding author

12 E-mail: [a.tasker@ucl.ac.uk](mailto:a.tasker@ucl.ac.uk) (AT)

13

14 Both authors contributed equally to this work

1

## 15 **Abstract**

## 16 **Background**

17 The emergence and transmission of zoonotic diseases are driven by complex interactions between  
18 health, environmental, and socio-political systems. Human movement is considered a significant and  
19 increasing factor in these processes, yet forced migration remains an understudied area of zoonotic  
20 research – due in part to the complexity of conducting interdisciplinary research in these settings.

## 21 **Objectives**

22 We conducted a systematic review to identify and analyze theoretical frameworks and approaches used  
23 to study linkages between forced migration and zoonotic diseases.

## 24 **Methods**

25 We searched within eight electronic databases: ProQuest, SCOPUS, Web of Science, PubMed, PLoSOne,  
26 Science Direct, JSTOR, and Google Scholar, to identify a) research articles focusing on zoonoses  
27 considering forced migrants in their study populations, and b) forced migration literature which engaged  
28 with zoonotic disease. Both authors conducted a full-text review, evaluating the quality of literature  
29 reviews and primary data using the Critical Appraisal Skills Programme (CASP) model, while theoretical  
30 papers were evaluated for quality using a theory synthesis adapted from Bonell and Fletcher (2013).  
31 Qualitative data were synthesized thematically according to the method suggested by Noblit and Hare  
32 (1988).

## 33 **Results**

34 Analyses of the 23 included articles showed the increasing use of interdisciplinary frameworks and  
35 approaches over time, the majority of which stemmed from political ecology. Approaches such as

36 EcoHealth and One Health were increasingly popular, but were more often linked to program  
37 implementation and development than broader contextual research. The majority of research failed to  
38 acknowledge the heterogeneity of migrant populations, lacked contextual depth, and insufficient  
39 acknowledgement of migrant agency in responding to zoonotic threats.

## 40 **Conclusions**

41 Addressing the emergence and spread of zoonoses in forced migration contexts requires more careful  
42 consideration and use of interdisciplinary research to integrate the contributions of social and natural  
43 science approaches. Robust interdisciplinary theoretical frameworks are an important step for better  
44 understanding the complex health, environment, and socio-political drivers of zoonotic diseases in  
45 forced migration. Lessons can be learned from the application of these approaches in other hard-to-  
46 reach or seldom-heard populations.

## 47 **Introduction**

48 Zoonotic diseases represent a growing threat to public health [1], with over 60% of newly emerging  
49 human pathogens originating in animal species [2]. This burden is felt unequally across populations, with  
50 endemic zoonotic diseases accounting for an estimated 20% of human illness and death in low- and  
51 middle-income settings (LMIS) [3]. Despite geographic variations in zoonotic disease impacts, recent  
52 pandemic outbreaks of Zika, Ebola, and SARS-CoV-2 provide stark reminders of the global importance of  
53 interspecies disease transmission. Zoonotic disease emergence is influenced by intersecting political,  
54 economic and social factors, operating from global to local levels [4, 5]. Population movements pose  
55 significant challenges to the control and prevention of zoonotic disease [6], yet the impact of migration  
56 on infectious disease remains poorly understood [7]. Migration, and forced migration in particular, pose  
57 unique theoretical [8], methodological [9], and ethical [10] challenges to zoonotic research as forced

58 migrant populations often sit awkwardly between geographies and research disciplines, resulting in the  
59 common treatment of forced migrants as homogenized sub-populations in environmental and political  
60 studies [11].

61 Across disciplines, scholars are increasingly recognising the importance of engaging with forced migrants  
62 as a distinct population. At the end of 2019, there were an estimated 79.5 million forced migrants,  
63 including 20.4 million refugees, 45.7 million internally displaced persons (IDPs), and 4.2 million asylum  
64 seekers [12]. LMIS bear the brunt of these displacements; political instability and disasters drive forced  
65 migrants to seek refuge within their own, or neighboring countries. Increased international connectivity  
66 has resulted in forced migration with profound impacts on global health [13]; factors such as exposure  
67 to new ecological environments and endemic diseases [14], limited sanitation [15], deteriorating health  
68 services [16], and increased human- and animal stress [17] are thought to drive the emergence and  
69 spread of infectious diseases.

70 The inherent relational complexities of forced migration and zoonotic diseases require a nuanced  
71 understanding of social, biological, and ecological factors which have not been adequately studied to  
72 date [18]. Traditional epidemiological approaches may struggle to represent the intersections of  
73 biological and social processes, creating barriers to accurate representation of the complex factors  
74 driving disease emergence, transmission and distribution [19]. The emergence of biosocial theoretical  
75 frameworks from epidemiological approaches have provided alternative tools to account for social  
76 interactions for understanding these complex interactions, influenced by their epistemological  
77 foundations (see, for example, Kingsley and Taylor (20)). As an important emerging field of study,  
78 research into zoonoses and forced migration requires a well-developed understanding of the contexts  
79 and drivers of forced migration, along with critical reflexivity of theoretical and methodological biases.  
80 This systematic review aims to make a significant contribution to the under-researched topic of

81 zoonoses in forced migration by identifying existing theoretical frameworks and approaches used, and

82 critically apprising these to inform future enquiry.

83

## 84 **Materials and Methods**

### 85 **Design**

86 Engaging with the multi-layered and intersecting drivers of zoonotic disease in forced migration contexts  
87 presents significant challenges for researchers. Evaluating the quality and utility of existing approaches  
88 used to study these complex dynamics is a vital first step in expanding our understanding of this  
89 understudied area. Our systematic literature review contributes to this emerging knowledge base by  
90 answering the research question: how have theoretical frameworks and approaches been utilized to  
91 study the role of forced migration in zoonotic disease dynamics?

92 We designed a systematic literature review to identify, collate, and comparatively analyze qualifying  
93 literature on zoonoses in forced migration to explore the theoretical and methodological foundations  
94 used in these articles. The original protocol for this study is registered with the Open Science  
95 Framework, DOI 10.17605/OSF.IO/E9JUF. The study follows the statements on the Preferred Reporting  
96 Items for Systematic Review and Meta-Analysis (PRISMA); the PRISMA flow chart is given in figure 1, the  
97 PRISMA statement for this study is provided in supplementary materials S1.

### 98 **Search strategy**

99 Eight electronic databases were interrogated in June 2020: ProQuest, SCOPUS, Web of Science,  
100 PubMed, PLoSOne, Science Direct, JStor, and Google Scholar, using the search terms zoono\* AND  
101 ("forced migra\*" OR "internal\* displace\*" OR refugee\*). Search terms were developed from wider  
102 analyses of zoonotic research, forced migration literature, expert suggestion, and informed by AT and  
103 DBs experience. No limit was placed on publication dates.

## 104 **Eligibility criteria**

105 Primary inclusion criteria were:

- 106 1. Publication of **full-text peer reviewed articles** available in **English**.
- 107 2. A **central focus on zoonotic disease**
- 108 3. The **specific inclusion** of one or more **forced migrant populations**
- 109 4. The **explicit use** of **theoretical frameworks or approaches** at any stage of the study.

## 110 **Screening and quality assessment**

111 Citations were downloaded and manually screened for duplicates by the authors (AT and DB); the  
112 remaining full articles were reviewed using the inclusion criteria above. Disagreements between the  
113 authors were resolved by consensus through discussion. The quality of literature reviews and primary  
114 data studies were verified using the standardized Critical Appraisal Skills Program (CASP) [21] approach  
115 to systematically assess the validity, rigor and contribution of sources to our research question and  
116 objective. There remains a lack of a standardized protocol to assess the quality of theory synthesis [22];  
117 we therefore evaluated the quality of theoretical evidence using criteria drawn from a theory synthesis  
118 conducted by Bonell, Fletcher (23). The quality assessment of sources using CASP criteria showed that  
119 included literature reviews and primary data were of high quality; the theoretical review revealed a  
120 limited number of assumptions, none of which led to disqualification from the study. The results of the  
121 combined quality assessment did not result in the exclusion of any studies, but increased the collective  
122 rigor of the synthesis [24]. The theoretical quality review is presented in S2, and the CASP quality review  
123 in S3.

## 124 **Data extraction and synthesis**

125 The synthesis was informed by an inductive qualitative comparative review to identify emergent key  
126 themes across the texts in line with the methodology detailed by Noblit and Hare (25). These themes  
127 were then interpreted drawing on wider forced migration and development literatures to explore the  
128 applications and limitations of each approach, creating six second order themes and two third-order  
129 themes, *population characterization* and *theory and practice*.

## 130 **Results**

### 131 **Search outcomes**

132 The systematic review identified 2,153 articles; removal of duplicates left 2,067 articles. Titles and  
133 abstract screening excluded a further 2,004 articles, leaving 63 articles for full-text analysis (see figure  
134 1). Twenty-three articles met the criteria for inclusion and were included in the comparative analysis,  
135 these are given in S4.

### 136 **Characteristics of included studies**

137 The majority of included publications were theoretical contributions (n = 10), with a limited number of  
138 literature reviews (n = 5 and commentary pieces (n = 3). The remaining articles combined meeting  
139 reports (n = 2), a lecture (n = 1), prevalence survey (n = 1), and response plan (n = 1). The characteristics  
140 of the papers are included in supplementary materials S4.

### 141 **Qualitative Analysis**

142 We conducted an inductive qualitative comparative analysis of the articles in line with the methodology  
143 described by Noblit and Hare (25). Six second order themes were identified: endemic versus exotic  
144 diseases, movement as a vector, homogenisations and generalisations, agency and action, environments

145 and environmental change, health systems and sanitation. These themes were interpreted to identify  
146 two second-order themes, population characterization, and theory and practice. The following section  
147 reviews the data under these organizing themes.

## 148 **A. Population characterization**

149 Human displacement is driven by a range of complex factors. Within the reviewed literature we  
150 identified five typologies of displacement and eight causes, detailed in supplementary materials S5. The  
151 majority of articles identified displaced populations as refugees (n = 16), however of these 16, half (n =  
152 8) did not consider the drivers of displacement. Where discussed, conflict (n = 7) and environmental  
153 change (n = 5) were the most common drivers; there was a progression towards a more substantiated  
154 discussion of conflict and environmental drivers in more recent articles.

155 Geographically, most publications focused on LMIS populations; 9 from a generalized global view and 11  
156 from a geographically-bounded perspective, including regional (e.g. sub-Saharan or Mediterranean) and  
157 country-specific foci (e.g. Turkey or Uganda); details of geographical foci are provided in supplementary  
158 materials S6. Despite many studies employing disaster narratives in their framings of specific  
159 humanitarian emergencies, there was limited evidence of clustering of locations around discrete  
160 disaster events linked to forced migration.

161 Geographical considerations are central to understanding zoonoses in forced migration. Vulnerabilities  
162 of forced migrant populations are rooted in historical and political contexts; drawing on case studies in  
163 Africa, Kalipeni and Oppong (26) argue that forced migration should be situated in historical migration  
164 events, showing how movements are interlinked with resource scarcity and conflict. The authors note  
165 how colonial powers' common disregard for local contextual understandings has led to the  
166 homogenisation of 'Africa'; the authors cite blind-spots to the uneven distribution of specific refugee  
167 populations across the continent as a consequence and symptom of reductionist approaches. Despite

168 these observations, the authors themselves stop short of linking homogenisations to differential  
169 individual- and collective disease risks within displaced populations.

170 The specific contribution of forced migration to zoonotic risks were less well explored. Multiple authors  
171 argued that resettlement programs and refugee migration may act as vectors for endemic disease into  
172 naive populations, citing increased disease risk through environmental and socioeconomic change such  
173 as poverty and health inequality [27-29]. The earliest work included in this review [30] suggested these  
174 factors be addressed through improved co-ordination of development programs; while subsequent work  
175 by Mayer (31) developed the need to disentangle disease risks in forced migration by improving  
176 understanding of biological drivers of disease dynamics. The author argued this was particularly true of  
177 dense and unhygienic settlements – forced migrants fell into this category. Despite acknowledging a  
178 need for greater depth of understanding, the majority of authors stopped short of engaging with the  
179 wider complexities of human migratory movements. Meanwhile, forced migration studies (as opposed  
180 to those specifically dealing with zoonoses) recognize how drivers of migration may have significant  
181 implications for health [32]. For example, McMichael (33) distinguishes between voluntary and forced  
182 migration, noting that “*well-managed migration could provide an adaptive response that reduces the*  
183 *adverse health impacts of climate change*” [33, p.549].

## 184 **B. Theory and practice**

185 The second theme identified tensions between research framed as more abstract theoretical enquiry,  
186 and more empirical, holistic approaches informed by a combination of theoretical precedent and  
187 contextual understandings. Adherence to structured theory during research remains a contested subject  
188 across disciplines, with views ranging from ‘there is nothing so practical as a good theory’ [34, p.18] to  
189 suggestions that the use of theory in research may inhibit intellectual engagements [35]. Theoretical  
190 foundations, and associated conceptual frameworks, are commonly used to construct and validate both

191 question and evidence, and as such are highly political processes that shape the outcomes of  
192 scholarship. We identified the use of fifteen discrete theoretical frameworks across the 23 studies,  
193 conducted by researchers from 11 disciplines and sub-disciplines. The first publication to explicitly  
194 employ a theoretical framework was published in 1988, with articles steadily increasing over time up to  
195 3 per year in 2015, 2017, and 2018. We observed a subjective movement from the use of social science  
196 perspectives such as political ecology (n = 2) and systems theory (n = 2) from the late 1990s-early 2000s  
197 towards more cross-disciplinary engagement employing Planetary Health (n = 3) and One Health (n = 7)  
198 lenses in the last six years. Our review included four studies (structured reviews (n = 3) and reports (n  
199 =1)) which gave little consideration to nuanced discussions around theory. The following section  
200 discusses each in turn; firstly more abstract theoretical studies, followed by more contextually-rooted  
201 work.

## 202 **Disciplines and theoretical frameworks**

203 Kalipeni and Oppong (26) explicitly employed a political ecological framework to suggest how disease  
204 dynamics frameworks should move beyond separate consideration of biophysical and environmental  
205 factors in forced migration. The authors highlighted how political and social forces underpin refugee  
206 crises, leading the authors to conceptualise unsanitary refugee camps as spaces which could lead to the  
207 emergence of zoonotic diseases. This framing links political and ecological drivers of refugee movement  
208 to negative health outcomes for forced migrants, through which the authors explicitly advocated for  
209 high-level responses to protect global health against zoonotic disease. These responses, they argue,  
210 must be understood through a nuanced multilevel historical contextualization of intersections between  
211 environmental and societal factors, including human agency in environmental changes.

212 Themes of environmental change can be found in many of the included studies. Writing two years later,  
213 Mayer (31) again used a political ecological approach to explore disease ecologies of emerging zoonotic

214 infections, this time rooted in a biomedical framework which incorporated the unintended  
215 consequences of human actions from individual to global levels. Pedersen (36) developed the political  
216 aspects of environmental change further, using a human rights-based lens to argue that ecosystems are  
217 overburdened by the 'pursuit of unlimited economic growth' [36, p.745]. This view placed the  
218 responsibility of zoonotic mitigation on high-level policy makers to directly engage with disease  
219 emergence. Pedersen argues in their study that natural resource conflict and development  
220 synergistically drive forced migration, which results in the burdens of disease being borne by the  
221 displaced; an insightful argument that resonates with many contemporary investigations of links  
222 between migration and health inequalities [37]. Despite a promising theme of enquiry, the author does  
223 not develop this position further to suggest how specific impacts of disease dynamics are driven, or felt  
224 by forced migrant populations.

225 Parallel to macro-political landscapes of inequalities and health, many studies in this review structured  
226 their research so as to present empirical case studies which explored the influence of national and  
227 international health systems on disease pathways. Spatial diffusion theory used by Bouma and Rowland  
228 (38) characterized Pakistani refugee camps as disease transmission nodes, driven by overcrowding and  
229 unsanitary living conditions, but limited attention was given to the specific mechanisms by which this  
230 may occur. An alternative exploration of disease diffusion was given by Schærström (39) who  
231 emphasized the individual and environmental challenges posed by these sites, once again the mechanics  
232 of these factors was left uncovered. In contrast, Singer (40) explicitly highlighted anthropogenic factors  
233 in mass population migration which may contribute to zoonoses through the development of syndemic  
234 theory. In their earlier paper, Singer suggested how microbial changes are linked to social and  
235 environmental conditions which in turn underpin zoonotic threats; these themes are revisited in their  
236 later paper through consideration of social justice, disease prevalence, and health inequalities driven by  
237 poverty, stress, and structural violence [41]. We suggest that this later article represents a step forward

238 in bridging multiple dimensions of zoonotic disease emergence in forced migration, most notably  
239 through the recognition of heterogeneity within specific study sites at global and local levels.

240 As noted earlier, social justice was discussed by both Pedersen (36) and Singer (40). In their report on  
241 the Anthropocene to The Rockefeller Foundation and Lancet Commission, Whitmee, Haines (42)  
242 continue this debate using a Planetary Health framework, calling for the integration of 'multisectoral  
243 actors' [42, p.2006] to transform health systems. A Planetary Health framework is again employed by  
244 Myers (43) to explore case studies of Ebola, HIV, and schistosomiasis through which they highlight links  
245 between human-ecosystem relationships and disease exposure risks. Myers argues that environmental  
246 changes are driven by social processes and population characteristics; this position is echoed by Flowra  
247 and Asaduzzaman (29) who consider climatic drivers of microbes and infection as linked to social  
248 changes. In parallel to the growth in non-forced migration literature exploring intersections between  
249 social and global environmental change, many of the later papers in this review recognized climatic  
250 change as a key factor in understanding the emergence and transmission of zoonoses. Myers (43)  
251 suggested environmental changes drive negative health outcomes for forced migrants through  
252 processes of malnutrition, infectious disease, and trauma. In parallel, Tomlinson, Hunt (44) detail the  
253 role of global environmental change as a potential driver of forced migration. Both of these studies  
254 frame their discussion of zoonotic disease outbreaks as a feature of increased overcrowding,  
255 deforestation and wildlife encroachment; both studies once again stop short of fully exploring the  
256 complexity and variability of the social and biological mechanisms leading to these outcomes.

## 257 **Approaches for research and implementation**

258 When evaluating zoonoses in forced migration, it is important to understand the often opaque  
259 relationship between theoretical and applied approaches used by researchers. For example, political  
260 ecology is often characterized as a theoretical approach, whereas frameworks including One Health and

261 EcoHealth resist easy definition, variously employed as theory, methodology, and a policy devices [45] –  
262 tools for both research and implementation. One Health approaches in this study were most commonly  
263 described as frameworks for either a) exploring eco-social processes driving infectious disease  
264 emergence and spread in human and animal populations [27], or b) tools for program development [28].  
265 In this review, One Health approaches were specifically applied to the behavior and movement of  
266 reservoir species for zoonotic disease pathogens [46, 47], and the exploration of zoonotic disease risks  
267 from poverty and poor hygiene [48]. These studies varied in location, population, and depth, ranging  
268 from granular explorations of respiratory infections in Kenyan and Thai refugee settlements [28] and  
269 Ebola in Congolese refugees in Ugandan camps [49], to more macro-level evaluations of Rift Valley Fever  
270 [46] and Nipah [50]. In this last example, the total engagement with One Health was as an aim for future  
271 work. Regardless of the topic and depth, no study which employed One Health acknowledged the role of  
272 historical, political and socio-economic drivers in their evaluations.

273 EcoHealth approaches in forced migration research emerged almost in parallel with One Health.  
274 EcoHealth shares much common ground with One Health, providing systems-based ways of thinking  
275 around zoonoses, disease emergence, and pandemic threats [51]. EcoHealth is often cited as  
276 contributing a more nuanced understanding of ecosystem drivers of disease than One Health [52],  
277 though it is unhelpful to consider either as a superior tool for holistic evaluation [53]. In the studies  
278 considered for this review, EcoHealth approaches were most commonly used to explore land use change  
279 and disease; using the framework, Patz, Daszak (54) discuss refugee movements as vectors for  
280 Tuberculosis and Hepatitis B, Confalonieri and Aparicio Effen (55) suggest Nipah links to land use change  
281 and Lyme disease through increased contact with host diversity, and Kittinger, Coontz (56) explore  
282 interactions with snail hosts of *Schistosomiasis*.

## 283 Discussion

284 Despite covering over three decades of work, the articles considered in the review consistently display a  
285 number of shortcomings. Most articles treated forced migrants as exemplar populations, proxies for  
286 exposure to specific and isolated risks, without acknowledgement or consideration of the inherent  
287 complexity and diversity of these populations. Multiple studies reviewed here chose to link human  
288 mobility to endemic and non-endemic disease exposure, reducing forced migrants to vectors for the  
289 movement of non-endemic disease into study populations. We argue that the reality for forced migrants  
290 is significantly more complex. Classifying populations as forced migrants for instance overlooks the fact  
291 that many within these communities may have been settled for many years [30]; indeed evidence  
292 suggests that disease patterns are similar between long-established forced migrant populations and  
293 host populations living in comparable living conditions [38]. From Africa [57], Asia [58], to Europe [59]  
294 and beyond, researchers are increasingly arguing for robust consideration of endogenous heterogeneity  
295 of migrant populations, and those at the margins of state control. For example both newly migrated,  
296 and long-term residents are situated within widely differentiated social networks [60]. These  
297 relationships offer diverse and differentiated resources that can shape zoonoses transmission,  
298 detection, and treatment. This complexity is compounded by the highly contextual nature of many  
299 endemic zoonotic diseases, operating within distinct ecological ranges. We argue that this renders  
300 generalisations solely on the basis of national borders unhelpful, especially when considered through  
301 the lens of long-term informal cross-border movements. From our previous research, we support the  
302 idea that communities labeled as *migratory* may often have more in common with settled indigenous  
303 groups in border zones than the wider national population. This underlines the importance of  
304 understanding political and social context when framing zoonotic disease risks in migrant populations, in  
305 particular the unique institutional landscape in which many refugees exist [61].

306 In addition to internal diversity and contextual detail, all studies considered in this review failed to  
307 consider migrant-led responses to zoonotic disease. Many articles cited poor sanitation and ineffective  
308 health systems, yet forced migrants have in the past adapted their surroundings through local water  
309 supply innovations [62], and developed internal networks for health provision [63]. In the last decade,  
310 multiple studies have detailed the endogenous creativity of migrant populations [64], to the point that  
311 refugee self-reliance has on occasion been co-opted as a development tool, arguably to the detriment of  
312 the communities in question [65, 66]. Despite external political influence, without acknowledgment of  
313 migrants' individual agency, and the dynamic nature of forced migrants' relationships with zoonotic  
314 disease, we suggest that research is likely to fail to accurately capture the complexity of these sites of  
315 disease emergence and transmission.

316 Our review does give cause for hope. The subjective shift from the political ecological approaches of the  
317 1990s and early 2000s, towards a more Public Health-based understanding in the last decade suggests a  
318 movement towards a more holistic, interdisciplinary treatment of complexity. These approaches are  
319 arguably better positioned to map the nonlinear nature of zoonoses which are driven by a variety of  
320 social, political, historical, economic, environmental, and biological factors. Advances in One Health and  
321 EcoHealth approaches have arguably outpaced wider understandings of the role of human migration on  
322 infectious disease, but we are optimistic that increasing attention offers the chance to bring these  
323 domains together. Despite this optimism, the centering of Public Health in forced migration zoonotic  
324 research should prompt critical reflection, informed by current debates on neocolonial aspects of  
325 international aid and development programming. Public Health has the ability to generate highly  
326 techno- and ethnocentric narratives which, rather than engaging local communities in healthcare, can  
327 serve to obfuscate indigenous knowledge systems and further disadvantage the most vulnerable.  
328 Considerations of social justice can be found across articles include in the review [31, 36, 44]; as  
329 research moves to engage with the inherent complexity of zoonotic research in forced migration, we

330 suggest that actors involved in forced migration, including national- and international NGOs,  
331 governments, and activist groups, should explore how these approaches may reflect local  
332 understandings and systems of power, rather than providing a façade for the business-as-usual of  
333 international assistance.

## 334 **Limitations of the review**

335 There are several limitations to this review. Only English language articles were included, limiting our  
336 engagement with indigenous scholarship. Secondly, it is possible that ethnographic studies exist that  
337 engage with zoonotic diseases using locally-defined terms which would not have been detected by the  
338 search protocol. This review only considered peer reviewed articles, making publication biases likely and  
339 selecting against internal reports from development organizations. Given the focus of this review was  
340 primarily theoretical, it reports and evaluations which did not explicitly employ theoretical or analytical  
341 frameworks will have been excluded.

## 342 **Conclusions**

343 The results of this review indicate that research on zoonotic diseases in forced migration increasingly  
344 employs interdisciplinary approaches to consider holistically social, environmental, and biological  
345 complexity. These approaches acknowledge linkages between human, animal, and environmental health  
346 through the integration of disciplines and participation of local stakeholders and interlocutors. Many of  
347 these approaches build on political ecological approaches to address macro-level disease risks, but often  
348 overlook the complexity and diversity of forced migrant populations. Studies continue to characterize  
349 movement as a major determinant for disease and health outcomes, despite a lack of evidence for doing  
350 so. Disease vulnerabilities depend on a multitude of internal and external factors which must be better

351 researched and contextualized; further work is required to build theoretical frameworks able to address  
352 the societal and biological processes of forced migration across time and space.

353

## 354 References

- 355 1. Plowright RK, Parrish CR, McCallum H, Hudson PJ, Ko AI, Graham AL, et al. Pathways to zoonotic  
356 spillover. *Nature Reviews Microbiology*. 2017;15(8):502-10.
- 357 2. Karesh WB, Dobson A, Lloyd-Smith JO, Lubroth J, Dixon MA, Bennett M, et al. Ecology of  
358 zoonoses: natural and unnatural histories. *The Lancet*. 2012;380(9857):1936-45.
- 359 3. Grace D, Jones B, McKeever D, Pfeiffer D, Mutua F. Zoonoses: Wildlife/livestock interactions  
360 Zoonoses Project 1; report to the UK Department for International Development and ILRI. Nairobi,  
361 Kenya: ILRI, and London, UK: Royal Veterinary College. 2011.
- 362 4. Zinsstag J, Schelling E, Waltner-Toews D, Tanner M. From “One Medicine” to “One Health” and  
363 Systemic Approaches to Health and Well-Being. *Preventive veterinary medicine*. 2010;101((3-4)):148–  
364 56.
- 365 5. Wendt A, Kreienbrock L, Campe A. Zoonotic disease surveillance—inventory of systems  
366 integrating human and animal disease information. *Zoonoses and public health*. 2015;62(1):61-74.
- 367 6. Galvani AP, May RM. Dimensions of superspreading. *Nature*. 2005;438(7066):293-5.
- 368 7. Kloos H, Correa-Oliveira R, dos Reis DC, Rodrigues EW, Monteiro LAS, Gazzinelli A. The role of  
369 population movement in the epidemiology and control of schistosomiasis in Brazil: a preliminary  
370 typology of population movement. *Memorias Do Instituto Oswaldo Cruz*. 2010;105(4):578-86. doi:  
371 10.1590/s0074-02762010000400038. PubMed PMID: WOS:000281973900038.
- 372 8. Gill N, Caletrio J, Mason V. *Mobilities and forced migration*: Routledge; 2017.
- 373 9. Voutira E, Doná G. Refugee research methodologies: Consolidation and transformation of a  
374 field. *Journal of Refugee Studies*. 2007;20(2):163-71.
- 375 10. Krause U. *Researching forced migration: critical reflections on research ethics during fieldwork*.  
376 *Refugee Studies Centre Working Paper Series*. 2017;(123).
- 377 11. Abel GJ, Brottrager M, Cuaresma JC, Muttarak R. Climate, conflict and forced migration. *Global*  
378 *Environmental Change*. 2019;54:239-49.
- 379 12. UNHCR. *Figures at a Glance 2020* [cited 2020 25th September]. Available from:  
380 <https://www.unhcr.org/uk/figures-at-a-glance.html>.
- 381 13. Huynen MM, Martens P, Hilderink HB. The health impacts of globalisation: a conceptual  
382 framework. *Globalization and health*. 2005;1(1):14.
- 383 14. Esteve-Gassent MD, Pérez de León AA, Romero-Salas D, Feria-Arroyo TP, Patino R, Castro-  
384 Arellano I, et al. Pathogenic landscape of transboundary zoonotic diseases in the Mexico–US border  
385 along the Rio Grande. *Frontiers in public health*. 2014;2:177.
- 386 15. Matilla F, Velleman Y, Harrison W, Nevel M. Animal influence on water, sanitation and hygiene  
387 measures for zoonosis control at the household level: A systematic literature review. *PLoS neglected*  
388 *tropical diseases*. 2018;12(7):e0006619.
- 389 16. Pacheco-Coral AdP. Statelessness, exodus, and health: forced internal displacement and health  
390 services. *Cadernos de saude publica*. 2018;34:e00027518.
- 391 17. Greger M. The human/animal interface: emergence and resurgence of zoonotic infectious  
392 diseases. *Critical reviews in microbiology*. 2007;33(4):243-99.
- 393 18. Aguirre AA, Basu N, Kahn LH, Morin XK, Echaubard P, Wilcox BA, et al. Transdisciplinary and  
394 social-ecological health frameworks—Novel approaches to emerging parasitic and vector-borne  
395 diseases. *Parasite epidemiology and control*. 2019;4:e00084.
- 396 19. Krieger N. *Epidemiology and the people's health: theory and context*: Oxford University Press;  
397 2011.

- 398 20. Kingsley P, Taylor E. One Health: competing perspectives in an emerging field. *Parasitology*.  
399 2017;144(1):7-14.
- 400 21. CASP. CASP. Critical Appraisal Skills Programme 2018 2018.
- 401 22. Campbell M, Egan M, Lorenc T, Bond L, Popham F, Fenton C, et al. Considering methodological  
402 options for reviews of theory: illustrated by a review of theories linking income and health. *Systematic*  
403 *reviews*. 2014;3(1):1-11.
- 404 23. Bonell C, Fletcher A, Jamal F, Wells H, Harden A, Murphy S, et al. Theories of how the school  
405 environment impacts on student health: systematic review and synthesis. *Health & Place*. 2013;24:242-  
406 9.
- 407 24. Walsh D, Downe S. Meta-synthesis method for qualitative research: a literature review. *Journal*  
408 *of advanced nursing*. 2005;50(2):204-11.
- 409 25. Noblit GW, Hare RD. *Meta-ethnography: Synthesizing qualitative studies*: sage; 1988.
- 410 26. Kalipeni E, Oppong J. The refugee crisis in Africa and implications for health and disease: a  
411 political ecology approach. *Social science & medicine*. 1998;46(12):1637-53.
- 412 27. Jones BA, Betson M, Pfeiffer DU. Eco-social processes influencing infectious disease emergence  
413 and spread. *Parasitology*. 2017;144(1):26-36.
- 414 28. Abubakar A, Barakat A, Ahmed A, El Kholy A, Alsawalh L, Al Ariqi L, et al. Fourth meeting of the  
415 Eastern Mediterranean Acute Respiratory Infection Surveillance (EMARIS) network and first scientific  
416 conference on acute respiratory infections in the Eastern Mediterranean Region, 11–14 December,  
417 2017, Amman, Jordan. *Journal of Infection and Public Health*. 2018;13(3):451-6. doi:  
418 <https://doi.org/10.1016/j.jiph.2020.02.031>.
- 419 29. Flowra MT, Asaduzzaman M. Resurgence of infectious diseases due to forced migration: is  
420 planetary health and One Health action synergistic? *The Lancet Planetary Health*. 2018;2(10):e419-e20.
- 421 30. Kloos H, Lo CT, Birrie H, Ayele T, Tedla S, Tsegay F. Schistosomiasis in Ethiopia. *Social science &*  
422 *medicine*. 1988;26(8):803-27.
- 423 31. Mayer JD. Geography, ecology and emerging infectious diseases. *Social science & medicine*.  
424 2000;50(7-8):937-52.
- 425 32. Ager A. Health and forced migration. *The Oxford handbook of refugee and forced migration*  
426 *studies*. 2014:433-46.
- 427 33. McMichael C. Climate change-related migration and infectious disease. *Virulence*.  
428 2015;6(6):548-53.
- 429 34. Greenwood DJ, Levin M. *Introduction to action research: Social research for social change*: SAGE  
430 *publications*; 2006.
- 431 35. Thomas G. What's the use of theory? *Harvard educational review*. 1997;67(1):75-105.
- 432 36. Pedersen D. Disease ecology at a crossroads: man-made environments, human rights and  
433 perpetual development utopias. *Social science & medicine*. 1996;43(5):745-58.
- 434 37. Malmusi D, Borrell C, Benach J. Migration-related health inequalities: showing the complex  
435 interactions between gender, social class and place of origin. *Social science & medicine*.  
436 2010;71(9):1610-9.
- 437 38. Bouma M, Rowland M. Failure of passive zooprophylaxis: cattle ownership in Pakistan is  
438 associated with a higher prevalence of malaria. *Transactions of the Royal Society of Tropical Medicine*  
439 *and Hygiene*. 1995;89(4):351-3.
- 440 39. Schærström A. *Disease Diffusion*. *The Wiley Blackwell Encyclopedia of Health, Illness, Behavior,*  
441 *and Society*. 2014:411-6.
- 442 40. Singer M. Zoonotic Ecosyndemics and Multispecies Ethnography. *Anthropological Quarterly*.  
443 2014;87(4):1279-309. doi: <http://dx.doi.org/10.1353/anq.2014.0060>. PubMed PMID: 1640764659.
- 444 41. Singer M, Bulled N, Ostrach B, Mendenhall E. Syndemics and the biosocial conception of health.  
445 *The Lancet*. 2017;389(10072):941-50.

- 446 42. Whitmee S, Haines A, Beyrer C, Boltz F, Capon AG, de Souza Dias BF, et al. Safeguarding human  
447 health in the Anthropocene epoch: report of The Rockefeller Foundation–Lancet Commission on  
448 planetary health. *The Lancet*. 2015;386(10007):1973-2028.
- 449 43. Myers SS. Planetary health: protecting human health on a rapidly changing planet. *The Lancet*.  
450 2017;390(10114):2860-8.
- 451 44. Tomlinson M, Hunt X, Skeen S. The ethics of flourishing or failing: Social, economic and  
452 environmental determinants of global mental health in an uncertain future. *Global Mental Health and*  
453 *Neuroethics*: Elsevier; 2020. p. 55-77.
- 454 45. Hinchliffe S. More than one world, more than one health: Re-configuring interspecies health.  
455 *Social science & medicine*. 2015;129:28-35. doi: 10.1016/j.socscimed.2014.07.007.
- 456 46. Nanyingi MO, Munyua P, Kiama SG, Muchemi GM, Thumbi SM, Bitek AO, et al. A systematic  
457 review of Rift Valley Fever epidemiology 1931–2014. *Infection ecology & epidemiology*.  
458 2015;5(1):28024.
- 459 47. Machalaba C, Romanelli C, Stoett P, Baum SE, Bouley TA, Daszak P, et al. Climate Change and  
460 Health: Transcending Silos to Find Solutions. *Annals of Global Health*. 2015;81(3):445-58. doi:  
461 <https://doi.org/10.1016/j.aogh.2015.08.002>.
- 462 48. İnci A, Doğanay M, Özdarendeli A, Düzlü Ö, Yıldırım A. Overview of zoonotic diseases in Turkey:  
463 the one health concept and future threats. *Türkiye Parazitoloji Dergisi*. 2018;42(1):39.
- 464 49. Aceng JR, Ario AR, Muruta AN, Makumbi I, Nanyunja M, Komakech I, et al. Uganda’s experience  
465 in Ebola virus disease outbreak preparedness, 2018–2019. *Globalization and Health*. 2020;16(1):1-12.
- 466 50. Machalaba C, Romanelli C, Stoett P, Baum SE, Bouley TA, Daszak P, et al. Climate change and  
467 health: Transcending silos to find solutions. Elsevier; 2015.
- 468 51. Zinsstag J. *Convergence of ecohealth and one health*. Springer; 2012.
- 469 52. Lerner H, Berg C. A comparison of three holistic approaches to health: one health, EcoHealth,  
470 and planetary health. *Frontiers in veterinary science*. 2017;4:163.
- 471 53. Harrison S, Kivuti-Bitok L, Macmillan A, Priest P. *EcoHealth and One Health: A theory-focused*  
472 *review in response to calls for convergence*. *Environment international*. 2019;132:105058.
- 473 54. Patz JA, Daszak P, Tabor GM, Aguirre AA, Pearl M, Epstein J, et al. Unhealthy landscapes: policy  
474 recommendations on land use change and infectious disease emergence. *Environmental health*  
475 *perspectives*. 2004;112(10):1092-8.
- 476 55. Confalonieri U, Aparicio Effen M. Overview of how ecosystem changes can affect human health.  
477 2011.
- 478 56. Kittinger JN, Coontz KM, Yuan Z, Han D, Zhao X, Wilcox BA. Toward holistic evaluation and  
479 assessment: linking ecosystems and human well-being for the Three Gorges Dam. *EcoHealth*.  
480 2009;6(4):601-13.
- 481 57. Barrett C, Smith K, Box P. Not Necessarily In The Same Boat: Heterogeneous Risk Assessment  
482 Among East African Pastoralists. *Journal of Development Studies*. 2001;37(5):1-30. doi:  
483 10.1080/00220380412331322101.
- 484 58. Fan CC. Migration in a socialist transitional economy: heterogeneity, socioeconomic and spatial  
485 characteristics of migrants in China and Guangdong Province. *International Migration Review*.  
486 1999;33(4):954-87.
- 487 59. Reinders H. *Migrant Youth in Europe: A Heterogeneous Generation at Risk*. Harvard  
488 *International Review*. 2012;34(2):39.
- 489 60. Colson E. Forced migration and the anthropological response. *Journal of refugee studies*.  
490 2003;16(1):1-18.
- 491 61. Betts A, Omata N, Sterck O. *Refugee Economies in Kenya*. Oxford, UK: Refugee Studies Centre,  
492 2018.

- 493 62. Schmitt ML, Wood OR, Clatworthy D, Rashid SF, Sommer M. Innovative Strategies For Providing  
494 Menstruation-Supportive Water, Sanitation And Hygiene (Wash) Facilities: Learning From Refugee  
495 Camps In Cox's Bazar, Bangladesh. 2020.
- 496 63. Chase L, Sapkota RP. "In our community, a friend is a psychologist": An ethnographic study of  
497 informal care in two Bhutanese refugee communities. *Transcultural Psychiatry*. 2017;54(3):400-22. doi:  
498 10.1177/1363461517703023. PubMed PMID: WOS:000402182000006.
- 499 64. Slaughter A, Tiwari AD, Wake C, Carpi E, Easton-Calabria E, Field J, et al. Refugee self-reliance:  
500 moving beyond the marketplace. 2017.
- 501 65. Hunter M. The failure of self-reliance in refugee settlements. *Polis Journal*. 2009;2(Winter):1-46.
- 502 66. Easton-Calabria E, Omata N. Panacea for the refugee crisis? Rethinking the promotion of 'self-  
503 reliance' for refugees. *Third World Quarterly*. 2018:1-17.
- 504 67. Aiken AC, Ott D, Kikovic N, Fanton C. Bosnia-Herzegovina and Croatia: An environmental health  
505 perspective. *Journal of Environmental Health*. 1996;59(5):6.
- 506 68. Nicole W. Seeing the forest for the trees: how "One Health" connects humans, animals, and  
507 ecosystems. NLM-Export; 2014.
- 508 69. Nanyingi M, Munyua P, Kiama SG, Muchemi GM, Thumbi SM, Bitek AO, et al. A systematic  
509 review of Rift Valley Fever epidemiology 1931-2014. *Infection Ecology & Epidemiology*. 2015;5. doi:  
510 <http://dx.doi.org/10.3402/iee.v5.28024>. PubMed PMID: 1701158510.
- 511 70. İnci A, Doğanay M, Özdarendeli A, Düzlü Ö, Yıldırım A. Overview of Zoonotic Diseases in Turkey:  
512 The One Health Concept and Future Threats. *Turkiye parazitoloji dergisi*. 2018;42(1):39-80. doi:  
513 10.5152/tpd.2018.5701.

514

515

## 516 **Supplementary materials**

517 S1 Table: PRISMA Statement

518 S2 Table: Theoretical quality review

519 S3 Table: CASP Quality Review

520 S4 Table: Publication characteristics and inclusion grid

521 S5 Table: Typologies and causes of displacement

522 S6 Table: Geographical focus and distribution of studies
